# Supplementary material for: Choline and methionine differentially alter methyl carbon metabolism in bovine neonatal hepatocytes
Source: PLoS One. 2017 Feb 2;12(2):e0171080. doi: 10.1371/journal.pone.0171080 (PMC5289486; doi:10.1371/journal.pone.0171080)
Supplement: S1 Data — (XLSX) [file pone.0171080.s001.xlsx]

## Sheet: gene expression
Sample ID	Calf	plate	choline	meth	fatty acid	RSP9	18S	BHMT	MAT1A	PEMT	MTR	MTTP	CPT1alpha	MTHFR
1	15	1	0.033	0.016	1	0.116	0.123	0.12	0.208	0.15	0.0981	0.197	0.14	0.046
4	15	1	0.033	0.03	1	0.111	0.129	0.127	0.185	0.119	0.122	0.128	0.147	0.131
7	15	1	0.033	0.1	1	0.108	0.123	0.156	0.203	0.143	0.123	0.167	0.171	0.0375
10	15	1	0.033	0.3	1	0.0742	0.115	0.175	0.176	0.122	0.0994	0.129	0.0832	0.0593
13	15	1	0.1	0.016	1	0.0749	0.127	0.149	0.156	0.156	0.164	0.197	0.109	0.167
16	15	1	0.1	0.03	1	0.0717	0.139	0.145	0.197	0.164	0.14	0.164	0.109	0.112
19	15	1	0.1	0.1	1	0.0946	0.0947	0.127	0.096	0.101	0.104	0.121	0.0718	0.0622
22	15	1	0.1	0.3	1	0.103	0.132	0.189	0.13	0.119	0.136	0.152	0.103	0.0936
25	15	1	2	0.016	1	0.0873	0.176	0.207	0.251	0.177	0.184	0.227	0.109	0.109
28	15	1	2	0.03	1	0.116	0.111	0.202	0.166	0.179	0.132	0.21	0.107	0.118
31	15	1	2	0.1	1	0.0857	0.0516	0.118	0.0652	0.0622	0.119	0.153	0.0459	0.0459
34	15	1	2	0.3	1	0.0888	0.0391	0.0581	0.0362	0.0346	0.0809	0.0644	0.0351	0.0369
37	15	1	4.5	0.016	1	0.13	0.11	0.183	0.0965	0.159	0.198	0.165	0.0684	0.0849
40	15	1	4.5	0.03	1	0.0753	0.0832	0.0714	0.0358	0.0721	0.14	0.073	0.0427	0.056
43	15	1	4.5	0.1	1	0.106	0.0955	0.101	0.059	0.0967	0.166	0.117	0.0566	0.052
46	15	1	4.5	0.3	1	0.133	0.123	0.105	0.0517	0.109	0.167	0.0995	0.0842	0.121
49	15	1	0.033	0.016	0	0.0951	0.0845	0.0964	0.2	0.151	0.16	0.209	0.0419	0.0811
52	15	1	0.033	0.03	0	0.092	0.0832	0.0713	0.118	0.0928	0.0757	0.133	0.0312	0.0783
55	15	1	0.033	0.1	0	0.12	0.115	0.0893	0.191	0.14	0.114	0.156	0.0446	0.092
58	15	1	0.033	0.3	0	0.0867	0.0981	0.0621	0.136	0.11	0.104	0.0847	0.0403	0.0653
61	15	1	0.1	0.016	0	0.0794	0.154	0.126	0.248	0.168	0.151	0.165	0.0413	0.09
64	15	1	0.1	0.03	0	0.0937	0.147	0.097	0.231	0.18	0.152	0.147	0.0401	0.111
67	15	1	0.1	0.1	0	0.085	0.0726	0.0576	0.109	0.0717	0.0913	0.0929	0.0235	0.0645
70	15	1	0.1	0.3	0	0.0787	0.103	0.0571	0.0988	0.0846	0.0952	0.0777	0.0225	0.0884
73	15	1	2	0.016	0	0.0885	0.0871	0.0677	0.112	0.138	0.201	0.138	0.0214	0.112
76	15	1	2	0.03	0	0.15	0.0683	0.0463	0.0564	0.0689	0.15	0.0952	0.0187	0.161
79	15	2	2	0.1	0	0.104	0.15	0.0937	0.0954	0.125	0.159	0.101	0.0471	0.195
82	15	2	2	0.3	0	0.106	0.0798	0.046	0.0291	0.0725	0.112	0.0402	0.0286	0.0879
85	15	2	4.5	0.016	0	0.104	0.0896	0.0477	0.0456	0.0907	0.143	0.0792	0.016	0.0544
88	15	2	4.5	0.03	0	0.0736	0.164	0.0759	0.0724	0.132	0.199	0.091	0.0367	0.103
91	15	2	4.5	0.1	0	0.0886	0.0669	0.0369	0.0217	0.0381	0.108	0.0414	0.0109	0.0555
94	15	2	4.5	0.3	0	0.0465	0.0393	0.0255	0.0126	0.0179	0.052	0.0228	0.00701	0.0555
1	16	2	0.033	0.016	1	0.0811	0.0888	0.147	0.125	0.0874	0.0587	0.194	0.0506	0.0421
4	16	2	0.033	0.03	1	0.0887	0.0653	0.11	0.0748	0.0456	0.0497	0.154	0.0445	0.0318
7	16	2	0.033	0.1	1	0.0756	0.187	0.179	0.241	0.145	0.0894	0.224	0.123	0.065
10	16	2	0.033	0.3	1	0.124	0.089	0.0871	0.0732	0.0668	0.0466	0.133	0.0743	0.043
13	16	2	0.1	0.016	1	0.114	0.0994	0.156	0.117	0.0928	0.0664	0.206	0.0416	0.0263
16	16	2	0.1	0.03	1	0.0729	0.0637	0.123	0.0817	0.0552	0.0513	0.154	0.0402	0.0184
19	16	2	0.1	0.1	1	0.0988	0.0472	0.096	0.0518	0.0413	0.0392	0.121	0.0363	0.0181
22	16	2	0.1	0.3	1	0.126	0.203	0.151	0.144	0.11	0.0761	0.144	0.0953	0.0503
25	16	2	2	0.016	1	0.0875	0.0957	0.179	0.166	0.157	0.0614	0.176	0.0485	0.0371
28	16	2	2	0.03	1	0.097	0.222	0.217	0.206	0.122	0.0836	0.182	0.112	0.0758
31	16	2	2	0.1	1	0.0826	0.209	0.099	0.0968	0.0837	0.0574	0.102	0.0567	0.0802
34	16	2	2	0.3	1	0.096	0.156	0.166	0.145	0.0911	0.0581	0.128	0.068	0.0687
37	16	2	4.5	0.016	1	0.129	0.179	0.285	0.315	0.137	0.121	0.218	0.0944	0.0623
40	16	2	4.5	0.03	1	0.133	0.192	0.247	0.197	0.123	0.0745	0.186	0.0816	0.0491
43	16	2	4.5	0.1	1	0.124	0.252	0.217	0.226	0.116	0.0864	0.179	0.0998	0.0647
46	16	2	4.5	0.3	1	0.104	0.271	0.148	0.256	0.116	0.0717	0.121	0.0985	0.082
49	16	2	0.033	0.016	0	0.103	0.172	0.143	0.231	0.116	0.0941	0.16	0.0165	0.0702
52	16	2	0.033	0.03	0	0.11	0.257	0.214	0.309	0.175	0.126	0.157	0.0459	0.0954
55	16	2	0.033	0.1	0	0.0803	0.318	0.169	0.248	0.14	0.119	0.128	0.0358	0.0729
58	16	2	0.033	0.3	0	0.121	0.229	0.145	0.155	0.108	0.106	0.093	0.0363	0.112
61	16	3	0.1	0.016	0	0.272	0.152	0.266	0.373	0.186	0.141	0.233	0.0868	0.0772
64	16	3	0.1	0.03	0	0.316	0.0723	0.196	0.166	0.0925	0.0782	0.141	0.032	0.0752
67	16	3	0.1	0.1	0	0.286	0.136	0.193	0.178	0.118	0.0905	0.119	0.0699	0.0731
70	16	3	0.1	0.3	0	0.249	0.131	0.208	0.196	0.14	0.1	0.122	0.0632	0.0492
73	16	3	2	0.016	0	0.246	0.135	0.317	0.248	0.166	0.14	0.174	0.0403	0.0713
76	16	3	2	0.03	0	0.182	0.136	0.341	0.239	0.154	0.13	0.156	0.0447	0.078
79	16	3	2	0.1	0	0.16	0.0436	0.166	0.0807	0.0527	0.084	0.106	0.0167	0.041
82	16	3	2	0.3	0	0.197	0.0996	0.206	0.103	0.115	0.097	0.0888	0.0548	0.0969
85	16	3	4.5	0.016	0	0.172	0.0318	0.197	0.0703	0.0518	0.0712	0.111	0.0151	0.044
88	16	3	4.5	0.03	0	0.225	0.112	0.269	0.205	0.127	0.0814	0.123	0.0521	0.135
91	16	3	4.5	0.1	0	0.244	0.118	0.304	0.211	0.158	0.24	0.133	0.0494	0.157
94	16	3	4.5	0.3	0	0.197	0.038	0.136	0.0482	0.0505	0.0981	0.0629	0.0209	0.0431
1	17	3	0.033	0.016	1	0.341	0.168	0.132	0.0615	0.14	0.189	0.118	0.191	0.149
4	17	3	0.033	0.03	1	0.316	0.14	0.134	0.0598	0.138	0.163	0.116	0.201	0.154
7	17	3	0.033	0.1	1	0.313	0.135	0.117	0.0484	0.121	0.111	0.111	0.141	0.0515
10	17	3	0.033	0.3	1	0.323	0.153	0.148	0.0782	0.147	0.154	0.132	0.23	0.14
13	17	3	0.1	0.016	1	0.353	0.194	0.13	0.0598	0.174	0.179	0.136	0.229	0.242
16	17	3	0.1	0.03	1	0.385	0.121	0.171	0.0644	0.156	0.157	0.138	0.183	0.22
19	17	3	0.1	0.1	1	0.499	0.162	0.191	0.0845	0.164	0.172	0.114	0.217	0.146
22	17	3	0.1	0.3	1	0.31	0.114	0.146	0.0756	0.13	0.158	0.131	0.211	0.126
25	17	3	2	0.016	1	0.124	0.0394	0.0658	0.0106	0.0298	0.0637	0.0566	0.0535	0.0539
28	17	3	2	0.03	1	0.353	0.119	0.203	0.0752	0.144	0.168	0.122	0.172	0.157
31	17	3	2	0.1	1	0.289	0.154	0.168	0.0721	0.111	0.124	0.0971	0.169	0.0898
34	17	3	2	0.3	1	0.252	0.132	0.129	0.0536	0.116	0.113	0.0905	0.126	0.0962
37	17	3	4.5	0.016	1	0.356	0.176	0.136	0.0322	0.135	0.169	0.0883	0.164	0.198
40	17	3	4.5	0.03	1	0.384	0.136	0.177	0.0655	0.148	0.162	0.107	0.198	0.124
43	17	4	4.5	0.1	1	0.262	0.153	0.143	0.0613	0.0885	0.122	0.111	0.22	0.19
46	17	4	4.5	0.3	1	0.175	0.117	0.0995	0.0957	0.128	0.0885	0.111	0.253	0.143
49	17	4	0.033	0.016	0	0.164	0.115	0.111	0.234	0.206	0.144	0.184	0.0703	0.176
52	17	4	0.033	0.03	0	0.18	0.127	0.0912	0.172	0.109	0.124	0.157	0.077	0.136
55	17	4	0.033	0.1	0	0.233	0.132	0.12	0.163	0.149	0.192	0.185	0.0977	0.199
58	17	4	0.033	0.3	0	0.229	0.148	0.0982	0.125	0.119	0.147	0.138	0.103	0.0901
61	17	4	0.1	0.016	0	0.179	0.112	0.126	0.181	0.123	0.212	0.209	0.0891	0.0727
64	17	4	0.1	0.03	0	0.219	0.0737	0.106	0.0904	0.111	0.13	0.162	0.0631	0.0187
67	17	4	0.1	0.1	0	0.229	0.0688	0.0797	0.0733	0.0806	0.145	0.145	0.0608	0.0644
70	17	4	0.1	0.3	0	0.252	0.127	0.123	0.227	0.117	0.149	0.141	0.111	0.236
73	17	4	2	0.016	0	0.187	0.149	0.149	0.263	0.175	0.216	0.172	0.0807	0.0854
76	17	4	2	0.03	0	0.209	0.152	0.118	0.151	0.139	0.169	0.138	0.0778	0.208
79	17	4	2	0.1	0	0.213	0.16	0.132	0.133	0.116	0.234	0.163	0.0969	0.166
82	17	4	2	0.3	0	0.145	0.123	0.0626	0.0461	0.0942	0.134	0.0628	0.0554	0.136
85	17	4	4.5	0.016	0	.	0.149	0.174	0.217	0.171	0.234	0.163	0.0894	0.26
88	17	4	4.5	0.03	0	0.195	0.13	0.128	0.125	0.122	0.183	0.125	0.0735	0.113
91	17	4	4.5	0.1	0	0.224	0.16	0.125	0.0955	0.126	0.255	0.159	0.0911	0.275
94	17	4	4.5	0.3	0	0.214	0.151	0.071	0.0651	0.109	0.157	0.0828	0.0649	0.11
1	18	4	0.033	0.016	1	0.182	0.0939	0.0104	0.0333	0.0333	0.0892	0.0584	0.103	0.0451
4	18	4	0.033	0.03	1	0.158	0.131	0.042	0.0733	0.0491	0.127	0.0909	0.173	0.0533
7	18	4	0.033	0.1	1	0.178	0.146	0.0276	0.0551	0.0397	0.0955	0.0957	0.178	0.083
10	18	4	0.033	0.3	1	0.199	0.157	0.0218	0.0467	0.0502	0.128	0.0811	0.201	0.105
13	18	4	0.1	0.016	1	0.202	0.0285	0.0247	0.0314	0.037	0.0944	0.0737	0.107	0.0335
16	18	4	0.1	0.03	1	0.219	0.0973	0.0439	0.0706	0.0617	0.152	0.115	0.175	0.0607
19	18	4	0.1	0.1	1	0.218	0.105	0.0308	0.0446	0.041	0.124	0.112	0.16	0.077
22	18	4	0.1	0.3	1	0.147	0.0369	0.0343	0.0747	0.0538	0.112	0.0894	0.157	0.0833
25	18	5	2	0.016	1	0.112	0.117	0.0245	0.0441	0.0429	0.117	0.0896	0.139	0.115
28	18	5	2	0.03	1	0.147	0.102	0.0253	0.0452	0.0365	0.0997	0.0773	0.119	0.0626
31	18	5	2	0.1	1	0.112	0.128	0.0214	0.0593	0.0404	0.103	0.0843	0.163	0.0998
34	18	5	2	0.3	1	0.101	0.124	0.0257	0.0573	0.0435	0.099	0.0695	0.163	0.0847
37	18	5	4.5	0.016	1	0.129	0.134	0.0258	0.0423	0.0411	0.126	0.0891	0.156	0.0681
40	18	5	4.5	0.03	1	0.186	0.142	0.035	0.0545	0.053	0.136	0.0957	0.198	0.12
43	18	5	4.5	0.1	1	0.183	0.164	0.0351	0.0677	0.0455	0.146	0.102	0.212	0.115
46	18	5	4.5	0.3	1	0.164	0.187	0.0396	0.0726	0.053	0.147	0.0929	0.229	0.175
49	18	5	0.033	0.016	0	0.111	0.0743	0.0644	0.0842	0.0439	0.107	0.174	0.0264	0.0695
52	18	5	0.033	0.03	0	0.124	0.16	0.0705	0.172	0.0929	0.135	0.158	0.0414	0.0951
55	18	5	0.033	0.1	0	0.185	0.144	0.0839	0.164	0.0992	0.117	0.194	0.0506	0.115
58	18	5	0.033	0.3	0	0.108	0.0676	0.0365	0.0552	0.0333	0.0701	0.0951	0.0187	0.0285
61	18	5	0.1	0.016	0	0.155	0.139	0.0915	0.124	0.0979	0.151	0.207	0.0346	0.0855
64	18	5	0.1	0.03	0	0.154	0.19	0.0952	0.184	0.115	0.198	0.232	0.0464	0.0715
67	18	5	0.1	0.1	0	0.139	0.106	0.0878	0.113	0.0719	0.144	0.197	0.0454	0.0922
70	18	5	0.1	0.3	0	0.0913	0.15	0.053	0.0947	0.0655	0.0885	0.0939	0.034	0.0464
73	18	5	2	0.016	0	0.167	0.169	0.106	0.146	0.101	0.13	0.183	0.0413	0.0901
76	18	5	2	0.03	0	0.109	0.138	0.0812	0.151	0.0835	0.104	0.153	0.0268	0.0836
79	18	5	2	0.1	0	0.178	0.151	0.0684	0.162	0.0968	0.12	0.135	0.0441	0.0582
82	18	5	2	0.3	0	0.146	0.131	0.0774	0.135	0.0797	0.0978	0.112	0.0361	0.131
85	18	5	4.5	0.016	0	0.123	0.15	0.102	0.222	0.101	0.125	0.158	0.0328	0.117
88	18	5	4.5	0.03	0	0.151	0.149	0.117	0.202	0.103	0.176	0.162	0.042	0.166
91	18	5	4.5	0.1	0	0.138	0.171	0.112	0.169	0.0921	0.13	0.181	0.04	0.0991
94	18	5	4.5	0.3	0	0.118	0.155	0.0975	0.124	0.0753	0.115	0.103	0.0434	0.115

## Sheet: ROS
sample ID	Calf	choline	meth	fatty acid	Fluroescence FA:noFA
1	16	0.033	0.016	0	1.13835
4	16	0.033	0.03	0	1.32642
7	16	0.033	0.1	0	1.3621
10	16	0.033	0.3	0	1.34
13	16	0.1	0.016	0	1.48588
16	16	0.1	0.03	0	1.32947
19	16	0.1	0.1	0	1.12198
22	16	0.1	0.3	0	1.21425
25	16	2	0.016	0	1.2208
28	16	2	0.03	0	1.34737
31	16	2	0.1	0	1.28818
34	16	2	0.3	0	1.18186
37	16	4.5	0.016	0	1.20188
40	16	4.5	0.03	0	1.10038
43	16	4.5	0.1	0	1.30027
46	16	4.5	0.3	0	1.32816
1	17	0.033	0.016	0	0.897739
4	17	0.033	0.03	0	0.852075
7	17	0.033	0.1	0	0.863217
10	17	0.033	0.3	0	0.823659
13	17	0.1	0.016	0	0.844654
16	17	0.1	0.03	0	0.841919
19	17	0.1	0.1	0	1.15893
22	17	0.1	0.3	0	1.29708
25	17	2	0.016	0	1.32075
28	17	2	0.03	0	1.61042
31	17	2	0.1	0	1.37931
34	17	2	0.3	0	1.31009
37	17	4.5	0.016	0	1.34922
40	17	4.5	0.03	0	1.43613
43	17	4.5	0.1	0	1.1464
46	17	4.5	0.3	0	1.45292
1	18	0.033	0.016	0	1.14032
4	18	0.033	0.03	0	1.22835
7	18	0.033	0.1	0	1.26087
10	18	0.033	0.3	0	1.28804
13	18	0.1	0.016	0	1.6317
16	18	0.1	0.03	0	1.22178
19	18	0.1	0.1	0	1.09463
22	18	0.1	0.3	0	1.11746
25	18	2	0.016	0	1.16087
28	18	2	0.03	0	1.26592
31	18	2	0.1	0	1.17525
34	18	2	0.3	0	1.12364
37	18	4.5	0.016	0	1.17979
40	18	4.5	0.03	0	1.11651
43	18	4.5	0.1	0	1.13712
46	18	4.5	0.3	0	1.18344

## Sheet: VLDL
Sample ID	calf	meth	choline	VLDL conc, ng/mL
1	15	0.016	0.033	14.4899
2	15	0.03	0.033	11.6579
3	15	0.1	0.033	9.64632
4	15	0.3	0.033	7.80877
5	15	0.016	0.1	11.546
6	15	0.03	0.1	11.4955
7	15	0.1	0.1	19.5916
8	15	0.3	0.1	20.5416
9	15	0.016	2	10.8301
10	15	0.03	2	8.72101
11	15	0.1	2	7.45416
12	15	0.3	2	6.78062
13	15	0.016	4.5	11.7297
14	15	0.03	4.5	13.4374
15	15	0.1	4.5	20.7589
16	15	0.3	4.5	20.9969
17	16	0.016	0.033	10.266
18	16	0.03	0.033	9.14389
19	16	0.1	0.033	8.36155
20	16	0.3	0.033	7.10319
21	16	0.016	0.1	7.78825
22	16	0.03	0.1	8.97705
23	16	0.1	0.1	12.4558
24	16	0.3	0.1	9.39587
25	16	0.016	2	26.4863
26	16	0.03	2	19.6534
27	16	0.1	2	17.9874
28	16	0.3	2	20.9546
29	16	0.016	4.5	18.8239
30	16	0.03	4.5	17.3828
31	16	0.1	4.5	13.9841
32	16	0.3	4.5	.
33	17	0.016	0.033	37.2822
34	17	0.03	0.033	22.8865
35	17	0.1	0.033	16.9691
36	17	0.3	0.033	16.9296
37	17	0.016	0.1	42.514
38	17	0.03	0.1	30.5691
39	17	0.1	0.1	24.0441
40	17	0.3	0.1	18.671
41	17	0.016	2	20.0233
42	17	0.03	2	27.3924
43	17	0.1	2	35.7166
44	17	0.3	2	40.4204
45	17	0.016	4.5	23.6978
46	17	0.03	4.5	23.1074
47	17	0.1	4.5	23.3342
48	17	0.3	4.5	36.0671
49	18	0.016	0.033	32.7867
50	18	0.03	0.033	19.1729
51	18	0.1	0.033	15.6572
52	18	0.3	0.033	25.0037
53	18	0.016	0.1	20.7759
54	18	0.03	0.1	16.6899
55	18	0.1	0.1	19.384
56	18	0.3	0.1	29.6016
57	18	0.016	2	23.6392
58	18	0.03	2	17.5329
59	18	0.1	2	10.0216
60	18	0.3	2	20.606
61	18	0.016	4.5	19.2254
62	18	0.03	4.5	14.2918
63	18	0.1	4.5	14.7018
64	18	0.3	4.5	9.5659
